# Supplementary material for: Beneficial Effects of Dietary Flaxseed on Non-Alcoholic Fatty Liver Disease
Source: MDPI journal article supplement (doi:10.3390/nu16040466), 2024-02-06
Supplement: s1 [file s1]

**Table S1. Circulating fatty acid analysis.**

| Fatty acids                  | Genotype | Sex    | Diet                       |                          |                         |                         |
|------------------------------|----------|--------|----------------------------|--------------------------|-------------------------|-------------------------|
|                              |          |        | Con                        | CFlax                    | HFHS                    | HFlax                   |
| C14:0<br>(Myristic acid)     | Lean     | Male   | 0.08±0.01 <sup>a</sup>     | 0.10±0.01 <sup>a</sup>   | 0.12±0.02 <sup>a</sup>  | 0.12±0.02 <sup>a</sup>  |
|                              |          | Female | 0.09±0.01 <sup>a</sup>     | 0.08±0.01 <sup>a</sup>   | 0.10±0.00 <sup>a</sup>  | 0.08±0.01 <sup>a</sup>  |
|                              | Obese    | Male   | 0.24±0.03 <sup>a****</sup> | 0.20±0.02 <sup>a*</sup>  | 0.21±0.03 <sup>a</sup>  | 0.17±0.02 <sup>a</sup>  |
|                              |          | Female | 0.20±0.02 <sup>a***</sup>  | 0.15±0.02 <sup>a,b</sup> | 0.12±0.01 <sup>b†</sup> | 0.13±0.01 <sup>b</sup>  |
| C15:0<br>(Pentadecylic acid) | Lean     | Male   | 0.13±0.01 <sup>a</sup>     | 0.15±0.01 <sup>a</sup>   | 0.06±0.01 <sup>b</sup>  | 0.07±0.00 <sup>b</sup>  |
|                              |          | Female | 0.09±0.01 <sup>a†</sup>    | 0.09±0.00 <sup>a†</sup>  | 0.05±0.00 <sup>b</sup>  | 0.05±0.00 <sup>b</sup>  |
|                              | Obese    | Male   | 0.13±0.01 <sup>a</sup>     | 0.11±0.01 <sup>a*</sup>  | 0.07±0.00 <sup>b</sup>  | 0.06±0.00 <sup>b</sup>  |
|                              |          | Female | 0.09±0.00 <sup>a†</sup>    | 0.09±0.01 <sup>a</sup>   | 0.05±0.00 <sup>b</sup>  | 0.05±0.00 <sup>b</sup>  |
| C16:0                        | Lean     | Male   | 11.25±0.47 <sup>a</sup>    | 10.35±0.39 <sup>a</sup>  | 11.66±0.48 <sup>a</sup> | 11.35±0.41 <sup>a</sup> |

|                               |       |        |                             |                               |                             |                           |
|-------------------------------|-------|--------|-----------------------------|-------------------------------|-----------------------------|---------------------------|
| (Palmitic acid)               |       | Female | 10.28±0.38 <sup>a</sup>     | 8.82±0.15 <sup>b</sup>        | 9.65±0.19 <sup>a,b</sup>    | 9.47±0.33 <sup>a,b</sup>  |
|                               | Obese | Male   | 17.69±0.63 <sup>a****</sup> | 15.65±0.18 <sup>b,c****</sup> | 15.90±0.33 <sup>b****</sup> | 14.20±0.14 <sup>c**</sup> |
|                               |       | Female | 13.42±0.79 <sup>a*†</sup>   | 11.81±1.33 <sup>a†</sup>      | 10.73±0.26 <sup>a†</sup>    | 10.91±0.83 <sup>a†</sup>  |
| C16:1<br>(Palmitoleic acid)   | Lean  | Male   | 0.09±0.01 <sup>a</sup>      | 0.11±0.01 <sup>a</sup>        | 0.13±0.01 <sup>a</sup>      | 0.09±0.01 <sup>a</sup>    |
|                               |       | Female | 0.18±0.01 <sup>a,c</sup>    | 0.24±0.02 <sup>b</sup>        | 0.24±0.01 <sup>b,c</sup>    | 0.22±0.01 <sup>b,c</sup>  |
|                               | Obese | Male   | 1.06±0.12 <sup>a****</sup>  | 1.18±0.14 <sup>a****</sup>    | 0.75±0.09 <sup>a***</sup>   | 0.66±0.12 <sup>a**</sup>  |
|                               |       | Female | 1.12±0.13 <sup>a****</sup>  | 0.97±0.19 <sup>a,b***</sup>   | 0.49±0.05 <sup>b</sup>      | 0.45±0.10 <sup>b</sup>    |
| C17:0<br>(Heptadecanoic acid) | Lean  | Male   | 0.34±0.03 <sup>a</sup>      | 0.34±0.01 <sup>a</sup>        | 0.16±0.01 <sup>b</sup>      | 0.14±0.01 <sup>b</sup>    |
|                               |       | Female | 0.32±0.03 <sup>a</sup>      | 0.34±0.03 <sup>a</sup>        | 0.14±0.01 <sup>b</sup>      | 0.14±0.01 <sup>b</sup>    |
|                               | Obese | Male   | 0.24±0.02 <sup>a**</sup>    | 0.22±0.02 <sup>a,b***</sup>   | 0.17±0.01 <sup>b</sup>      | 0.18±0.01 <sup>b</sup>    |
|                               |       | Female | 0.22±0.01 <sup>a**</sup>    | 0.22±0.02 <sup>a**</sup>      | 0.13±0.00 <sup>b</sup>      | 0.14±0.01 <sup>b</sup>    |
| C17:1                         | Lean  | Male   | 48.19±3.20 <sup>a</sup>     | 49.22±1.94 <sup>a</sup>       | 44.89±1.89 <sup>a</sup>     | 47.72±2.16 <sup>a</sup>   |

|                             |       |        |                             |                            |                           |                            |
|-----------------------------|-------|--------|-----------------------------|----------------------------|---------------------------|----------------------------|
| (cis-10-Heptadecanoic acid) |       | Female | 40.77±2.28 <sup>a</sup>     | 47.33±1.45 <sup>a</sup>    | 46.23±0.78 <sup>a</sup>   | 44.80±2.35 <sup>a</sup>    |
|                             | Obese | Male   | 24.91±1.99 <sup>a****</sup> | 33.50±1.69 <sup>b***</sup> | 31.93±1.50 <sup>b**</sup> | 34.23±1.01 <sup>b**</sup>  |
|                             |       | Female | 30.64±3.53 <sup>a</sup>     | 33.82±5.73 <sup>a</sup>    | 44.11±1.75 <sup>a</sup>   | 40.25±4.34 <sup>a</sup>    |
| C18:0<br>(Stearic acid)     | Lean  | Male   | 9.52±0.68 <sup>a</sup>      | 9.52±0.37 <sup>a</sup>     | 12.31±0.63 <sup>b</sup>   | 11.62±0.35 <sup>b</sup>    |
|                             |       | Female | 15.56±0.69 <sup>a†</sup>    | 13.35±0.38 <sup>b†</sup>   | 14.79±0.31 <sup>a,b</sup> | 15.21±0.56 <sup>a,b†</sup> |
|                             | Obese | Male   | 12.57±0.21 <sup>a**</sup>   | 11.55±0.37 <sup>a</sup>    | 13.40±0.69 <sup>a</sup>   | 13.70±0.22 <sup>a</sup>    |
|                             |       | Female | 15.04±0.54 <sup>a</sup>     | 15.20±0.64 <sup>a†</sup>   | 14.43±0.44 <sup>a</sup>   | 15.55±1.23 <sup>a</sup>    |
| C18:1<br>(Oleic acid)       | Lean  | Male   | 3.22±0.19 <sup>a</sup>      | 3.28±0.19 <sup>a</sup>     | 6.21±0.11 <sup>b</sup>    | 5.90±0.31 <sup>b</sup>     |
|                             |       | Female | 2.72±0.10 <sup>a</sup>      | 2.43±0.05 <sup>a</sup>     | 4.91±0.11 <sup>b</sup>    | 4.55±0.24 <sup>b</sup>     |
|                             | Obese | Male   | 7.55±0.69 <sup>a****</sup>  | 5.73±0.28 <sup>b***</sup>  | 8.38±0.29 <sup>a**</sup>  | 7.07±0.23 <sup>a,b</sup>   |
|                             |       | Female | 8.22±0.98 <sup>a****</sup>  | 6.38±1.32 <sup>a**</sup>   | 5.62±0.35 <sup>a†</sup>   | 5.75±0.25 <sup>a</sup>     |
|                             | Lean  | Male   | 0.89±0.06 <sup>a,b</sup>    | 0.95±0.04 <sup>a</sup>     | 0.77±0.01 <sup>b</sup>    | 0.74±0.03 <sup>b</sup>     |

|                                          |       |        |                            |                           |                          |                          |
|------------------------------------------|-------|--------|----------------------------|---------------------------|--------------------------|--------------------------|
| C18:1n7 ( <i>cis</i> -<br>Vaccenic acid) |       | Female | 0.70±0.08 <sup>a</sup>     | 0.83±0.11 <sup>a</sup>    | 0.61±0.01 <sup>a</sup>   | 0.68±0.10 <sup>a</sup>   |
|                                          | Obese | Male   | 1.39±0.02 <sup>a</sup>     | 1.18±0.05 <sup>a,b</sup>  | 0.90±0.02 <sup>b</sup>   | 1.07±0.24 <sup>a,b</sup> |
|                                          |       | Female | 0.88±0.06 <sup>a†</sup>    | 0.84±0.10 <sup>a†</sup>   | 0.69±0.03 <sup>a</sup>   | 0.70±0.04 <sup>a</sup>   |
| C18:2 n-6<br>(Linoleic acid)             | Lean  | Male   | 9.87±0.40 <sup>a</sup>     | 12.26±0.51 <sup>b</sup>   | 7.26±0.22 <sup>c</sup>   | 7.92±0.28 <sup>c</sup>   |
|                                          |       | Female | 8.73±0.43 <sup>a</sup>     | 9.09±0.33 <sup>a†</sup>   | 5.71±0.53 <sup>b</sup>   | 5.87±0.24 <sup>b</sup>   |
|                                          | Obese | Male   | 13.56±1.00 <sup>a***</sup> | 11.33±0.53 <sup>a,b</sup> | 9.35±0.31 <sup>b,c</sup> | 8.51±0.23 <sup>c</sup>   |
|                                          |       | Female | 9.99±0.76 <sup>a†</sup>    | 8.70±0.79 <sup>a†</sup>   | 4.36±0.19 <sup>b†</sup>  | 5.48±0.56 <sup>b†</sup>  |
| C18:3 n-6 (Gamma-<br>linolenic acid)     | Lean  | Male   | 0.03±0.01 <sup>a</sup>     | 0.03±0.00 <sup>a</sup>    | 0.03±0.01 <sup>a</sup>   | 0.02±0.01 <sup>a</sup>   |
|                                          |       | Female | 0.05±0.01 <sup>a</sup>     | 0.04±0.00 <sup>a</sup>    | 0.05±0.01 <sup>a</sup>   | 0.05±0.02 <sup>a</sup>   |
|                                          | Obese | Male   | 0.07±0.00 <sup>a**</sup>   | 0.05±0.01 <sup>b</sup>    | 0.04±0.00 <sup>b</sup>   | 0.04±0.01 <sup>b</sup>   |
|                                          |       | Female | 0.09±0.02 <sup>a</sup>     | 0.06±0.01 <sup>a,b</sup>  | 0.04±0.00 <sup>b</sup>   | 0.03±0.00 <sup>b</sup>   |
| C20:0                                    | Lean  | Male   | 0.05±0.02 <sup>a</sup>     | 0.05±0.00 <sup>a</sup>    | 0.07±0.01 <sup>a</sup>   | 0.07±0.01 <sup>a</sup>   |

|                                   |       |        |                          |                           |                          |                           |
|-----------------------------------|-------|--------|--------------------------|---------------------------|--------------------------|---------------------------|
| (Arachidic acid)                  |       | Female | 0.05±0.00 <sup>a</sup>   | 0.06±0.01 <sup>a</sup>    | 0.08±0.01 <sup>a</sup>   | 0.07±0.01 <sup>a</sup>    |
|                                   | Obese | Male   | 0.05±0.00 <sup>a</sup>   | 0.05±0.01 <sup>a</sup>    | 0.06±0.01 <sup>a</sup>   | 0.06±0.00 <sup>a</sup>    |
|                                   |       | Female | 0.04±0.00 <sup>a</sup>   | 0.03±0.00 <sup>a</sup>    | 0.04±0.00 <sup>a**</sup> | 0.04±0.00 <sup>a*</sup>   |
| C20:1<br>(Eicosenoic acid)        | Lean  | Male   | 0.19±0.05 <sup>a</sup>   | 0.19±0.02 <sup>a</sup>    | 0.19±0.02 <sup>a</sup>   | 0.18±0.01 <sup>a</sup>    |
|                                   |       | Female | 0.19±0.07 <sup>a</sup>   | 0.25±0.13 <sup>a</sup>    | 0.14±0.00 <sup>a</sup>   | 0.28±0.13 <sup>a</sup>    |
|                                   | Obese | Male   | 0.14±0.02 <sup>a</sup>   | 0.11±0.03 <sup>a</sup>    | 0.16±0.01 <sup>a</sup>   | 0.09±0.03 <sup>a</sup>    |
|                                   |       | Female | 0.11±0.01 <sup>a</sup>   | 0.09±0.01 <sup>a</sup>    | 0.12±0.01 <sup>a</sup>   | 0.21±0.11 <sup>a</sup>    |
| C20:2 n-6<br>(Eicosadienoic acid) | Lean  | Male   | 0.22±0.01 <sup>a</sup>   | 0.14±0.01 <sup>b</sup>    | 0.08±0.00 <sup>c</sup>   | 0.07±0.01 <sup>c</sup>    |
|                                   |       | Female | 0.13±0.01 <sup>a†</sup>  | 0.09±0.01 <sup>a,b†</sup> | 0.08±0.01 <sup>b</sup>   | 0.08±0.01 <sup>b</sup>    |
|                                   | Obese | Male   | 0.25±0.01 <sup>a</sup>   | 0.17±0.01 <sup>b</sup>    | 0.20±0.01 <sup>c</sup>   | 0.17±0.01 <sup>b</sup>    |
|                                   |       | Female | 0.13±0.02 <sup>a†</sup>  | 0.10±0.01 <sup>a,b†</sup> | 0.08±0.00 <sup>b†</sup>  | 0.10±0.01 <sup>a,b†</sup> |
| C20:3 n-6                         | Lean  | Male   | 0.15±0.01 <sup>a,c</sup> | 0.33±0.01 <sup>b</sup>    | 0.20±0.01 <sup>c</sup>   | 0.20±0.02 <sup>c</sup>    |

|                                    |       |        |                             |                              |                              |                             |
|------------------------------------|-------|--------|-----------------------------|------------------------------|------------------------------|-----------------------------|
| (Dihomo-gamma-linolenic acid)      |       | Female | 0.20±0.02 <sup>a</sup>      | 0.31±0.02 <sup>a</sup>       | 0.26±0.03 <sup>a</sup>       | 0.26±0.04 <sup>a</sup>      |
|                                    | Obese | Male   | 1.56±0.05 <sup>a****</sup>  | 1.13±0.05 <sup>b,c****</sup> | 1.38±0.09 <sup>a,b****</sup> | 1.00±0.06 <sup>c****</sup>  |
|                                    |       | Female | 0.74±0.08 <sup>a****†</sup> | 0.66±0.03 <sup>a****†</sup>  | 0.34±0.03 <sup>b†</sup>      | 0.51±0.05 <sup>a,b**†</sup> |
| C20:4 n-6<br>(Arachidonic acid)    | Lean  | Male   | 12.68±1.30 <sup>a</sup>     | 6.74±0.44 <sup>b</sup>       | 13.23±0.57 <sup>a</sup>      | 10.14±0.53 <sup>a</sup>     |
|                                    |       | Female | 14.37±0.84 <sup>a</sup>     | 8.31±0.36 <sup>b</sup>       | 13.17±0.65 <sup>a</sup>      | 12.39±1.20 <sup>a</sup>     |
|                                    | Obese | Male   | 11.95±0.47 <sup>a</sup>     | 7.73±0.29 <sup>b</sup>       | 12.75±0.73 <sup>a</sup>      | 12.88±0.37 <sup>a</sup>     |
|                                    |       | Female | 11.95±0.33 <sup>a</sup>     | 8.90±0.72 <sup>b</sup>       | 13.37±0.52 <sup>c</sup>      | 12.56±1.30 <sup>a</sup>     |
| C20:3 n-3<br>(Eicosatrienoic acid) | Lean  | Male   | 0.09±0.07 <sup>a</sup>      | 0.07±0.01 <sup>a</sup>       | 0.15±0.03 <sup>a</sup>       | 0.20±0.05 <sup>a</sup>      |
|                                    |       | Female | 0.02±0.01 <sup>a</sup>      | 0.06±0.01 <sup>a</sup>       | 0.12±0.01 <sup>b</sup>       | 0.17±0.02 <sup>b</sup>      |
|                                    | Obese | Male   | 0.02±0.00 <sup>a</sup>      | 0.08±0.01 <sup>a</sup>       | 0.37±0.05 <sup>b**</sup>     | 0.32±0.05 <sup>b</sup>      |
|                                    |       | Female | 0.01±0.00 <sup>a</sup>      | 0.08±0.01 <sup>b</sup>       | 0.11±0.01 <sup>b,c†</sup>    | 0.14±0.01 <sup>c</sup>      |
| C22:0                              | Lean  | Male   | 0.10±0.02 <sup>a</sup>      | 0.09±0.01 <sup>a</sup>       | 0.13±0.02 <sup>a</sup>       | 0.14±0.01 <sup>a</sup>      |

|                            |       |        |                         |                          |                           |                           |
|----------------------------|-------|--------|-------------------------|--------------------------|---------------------------|---------------------------|
| (Behenic acid)             |       | Female | 0.16±0.01 <sup>a</sup>  | 0.13±0.00 <sup>a</sup>   | 0.16±0.01 <sup>a</sup>    | 0.21±0.02 <sup>b†</sup>   |
|                            | Obese | Male   | 0.10±0.00 <sup>a</sup>  | 0.12±0.00 <sup>a,b</sup> | 0.13±0.01 <sup>a,b</sup>  | 0.16±0.02 <sup>b</sup>    |
|                            |       | Female | 0.08±0.00 <sup>a*</sup> | 0.08±0.01 <sup>a</sup>   | 0.12±0.00 <sup>a</sup>    | 0.12±0.03 <sup>a***</sup> |
| C22:4<br>(Adrenic acid)    | Lean  | Male   | 0.13±0.02 <sup>a</sup>  | 0.05±0.00 <sup>b</sup>   | 0.20±0.01 <sup>c</sup>    | 0.08±0.02 <sup>a,b</sup>  |
|                            |       | Female | 0.14±0.01 <sup>a</sup>  | 0.04±0.01 <sup>b</sup>   | 0.30±0.02 <sup>c†</sup>   | 0.10±0.02 <sup>a,b</sup>  |
|                            | Obese | Male   | 0.15±0.01 <sup>a</sup>  | 0.07±0.01 <sup>b</sup>   | 0.14±0.02 <sup>a</sup>    | 0.15±0.02 <sup>a</sup>    |
|                            |       | Female | 0.17±0.02 <sup>a</sup>  | 0.06±0.01 <sup>b</sup>   | 0.32±0.02 <sup>c†</sup>   | 0.14±0.02 <sup>a</sup>    |
| C22:5 n-6<br>(Osbond acid) | Lean  | Male   | 0.03±0.01 <sup>a</sup>  | 0.03±0.00 <sup>a</sup>   | 0.19±0.02 <sup>a</sup>    | 0.03±0.01 <sup>a</sup>    |
|                            |       | Female | 0.06±0.00 <sup>a</sup>  | 0.01±0.00 <sup>a</sup>   | 0.82±0.05 <sup>c†</sup>   | 0.06±0.02 <sup>a</sup>    |
|                            | Obese | Male   | 0.07±0.01 <sup>a</sup>  | 0.06±0.01 <sup>a</sup>   | 0.09±0.02 <sup>a***</sup> | 0.04±0.00 <sup>a</sup>    |
|                            |       | Female | 0.06±0.01 <sup>a</sup>  | 0.02±0.00 <sup>a</sup>   | 0.67±0.09 <sup>b†</sup>   | 0.06±0.02 <sup>a</sup>    |
| C22:5 n-3                  | Lean  | Male   | 0.29±0.01 <sup>a</sup>  | 0.87±0.09 <sup>b</sup>   | 0.23±0.02 <sup>a</sup>    | 0.58±0.04 <sup>c</sup>    |

|                            |       |        |                           |                            |                         |                          |
|----------------------------|-------|--------|---------------------------|----------------------------|-------------------------|--------------------------|
| (Docosapentaenoic acid)    |       | Female | 0.34±0.03 <sup>a</sup>    | 0.73±0.06 <sup>b</sup>     | 0.20±0.02 <sup>a</sup>  | 0.82±0.05 <sup>b,c</sup> |
|                            | Obese | Male   | 0.78±0.05 <sup>a***</sup> | 1.57±0.02 <sup>b****</sup> | 0.34±0.10 <sup>c</sup>  | 0.81±0.02 <sup>a</sup>   |
|                            |       | Female | 0.68±0.07 <sup>a</sup>    | 1.42±0.23 <sup>a***</sup>  | 0.25±0.01 <sup>b</sup>  | 0.86±0.06 <sup>a</sup>   |
| C24:0<br>(Lignoceric acid) | Lean  | Male   | 0.16±0.06 <sup>a</sup>    | 0.21±0.03 <sup>a</sup>     | 0.17±0.02 <sup>a</sup>  | 0.16±0.02 <sup>a</sup>   |
|                            |       | Female | 0.32±0.04 <sup>a†</sup>   | 0.34±0.03 <sup>a†</sup>    | 0.16±0.01 <sup>b</sup>  | 0.24±0.03 <sup>a,b</sup> |
|                            | Obese | Male   | 0.18±0.02 <sup>a,b</sup>  | 0.21±0.02 <sup>a</sup>     | 0.13±0.01 <sup>b</sup>  | 0.21±0.03 <sup>a</sup>   |
|                            |       | Female | 0.12±0.02 <sup>a***</sup> | 0.12±0.01 <sup>a****</sup> | 0.08±0.01 <sup>a</sup>  | 0.12±0.02 <sup>a*</sup>  |
| C24:1<br>(Nervonic acid)   | Lean  | Male   | 0.17±0.06 <sup>a</sup>    | 0.16±0.03 <sup>a</sup>     | 0.21±0.03 <sup>a</sup>  | 0.24±0.02 <sup>a</sup>   |
|                            |       | Female | 0.35±0.01 <sup>a†</sup>   | 0.30±0.01 <sup>a</sup>     | 0.29±0.02 <sup>a</sup>  | 0.30±0.04 <sup>a</sup>   |
|                            | Obese | Male   | 0.20±0.01 <sup>a</sup>    | 0.20±0.02 <sup>a</sup>     | 0.33±0.02 <sup>b*</sup> | 0.31±0.00 <sup>b</sup>   |
|                            |       | Female | 0.13±0.01 <sup>a***</sup> | 0.13±0.01 <sup>a*</sup>    | 0.26±0.00 <sup>a</sup>  | 0.24±0.07 <sup>a</sup>   |
| ΣSFA                       | Lean  | Male   | 21.60±1.21 <sup>a</sup>   | 20.77±0.76 <sup>a</sup>    | 24.68±1.17 <sup>a</sup> | 23.61±0.80 <sup>a</sup>  |



|       |       |        |                             |                             |                             |                             |
|-------|-------|--------|-----------------------------|-----------------------------|-----------------------------|-----------------------------|
|       |       | Female | 26.86±1.00 <sup>a</sup>     | 23.21±0.54 <sup>b</sup>     | 25.12±0.45 <sup>a,b</sup>   | 25.47±0.93 <sup>a,b</sup>   |
|       | Obese | Male   | 31.19±0.63 <sup>a****</sup> | 28.10±0.54 <sup>b****</sup> | 30.08±0.66 <sup>a,b**</sup> | 28.74±0.36 <sup>a,b**</sup> |
|       |       | Female | 29.22±1.29 <sup>a</sup>     | 27.70±1.87 <sup>a</sup>     | 25.70±0.68 <sup>a</sup>     | 27.05±2.07 <sup>a</sup>     |
| ΣMUFA | Lean  | Male   | 52.70±3.00 <sup>a</sup>     | 53.88±1.57 <sup>a</sup>     | 52.70±1.76 <sup>a</sup>     | 54.93±1.71 <sup>a</sup>     |
|       |       | Female | 44.79±2.28 <sup>a</sup>     | 51.22±1.33 <sup>a,b</sup>   | 52.56±0.81 <sup>b</sup>     | 50.71±2.30 <sup>a,b</sup>   |
|       | Obese | Male   | 35.10±1.57 <sup>a****</sup> | 41.75±1.12 <sup>b**</sup>   | 42.61±1.71 <sup>b**</sup>   | 43.58±0.76 <sup>b**</sup>   |
|       |       | Female | 41.07±2.67 <sup>a</sup>     | 42.18±4.44 <sup>a</sup>     | 51.41±1.40 <sup>a</sup>     | 47.56±4.45 <sup>a</sup>     |
| Σn-6  | Lean  | Male   | 23.13±1.66 <sup>a</sup>     | 19.66±0.48 <sup>a,b</sup>   | 21.18±0.54 <sup>a,b</sup>   | 18.42±0.81 <sup>b</sup>     |
|       |       | Female | 23.66±1.19 <sup>a</sup>     | 17.87±0.59 <sup>b</sup>     | 20.39±0.32 <sup>a,b</sup>   | 18.75±1.07 <sup>b</sup>     |
|       | Obese | Male   | 27.62±0.79 <sup>a</sup>     | 20.52±0.28 <sup>b</sup>     | 23.95±0.78 <sup>c</sup>     | 22.77±0.30 <sup>b,c</sup>   |
|       |       | Female | 23.14±1.04 <sup>a</sup>     | 18.48±1.09 <sup>a</sup>     | 19.18±0.68 <sup>a‡</sup>    | 18.86±1.83 <sup>a</sup>     |
| Σn-3  | Lean  | Male   | 2.60±0.18 <sup>a,c</sup>    | 5.67±0.43 <sup>b</sup>      | 1.41±0.07 <sup>a</sup>      | 3.01±0.18 <sup>c</sup>      |

|       |       |        |                            |                            |                          |                          |
|-------|-------|--------|----------------------------|----------------------------|--------------------------|--------------------------|
|       |       | Female | 4.67±0.20 <sup>‡</sup>     | 7.70±0.31 <sup>b‡</sup>    | 1.91±0.14 <sup>c</sup>   | 5.05±0.31 <sup>‡</sup>   |
|       | Obese | Male   | 6.07±0.19 <sup>a****</sup> | 9.62±0.32 <sup>b****</sup> | 3.34±0.47 <sup>c**</sup> | 4.90±0.12 <sup>a**</sup> |
|       |       | Female | 6.56±0.40 <sup>a</sup>     | 11.62±1.63 <sup>b**</sup>  | 3.69±0.17 <sup>a</sup>   | 6.53±0.55 <sup>a</sup>   |
| ΣPUFA | Lean  | Male   | 25.72±1.84 <sup>a</sup>    | 25.33±0.85 <sup>a</sup>    | 22.59±0.58 <sup>a</sup>  | 21.43±0.96 <sup>a</sup>  |
|       |       | Female | 28.33±1.30 <sup>a</sup>    | 25.56±0.83 <sup>a,b</sup>  | 22.30±0.39 <sup>b</sup>  | 23.80±1.38 <sup>b</sup>  |
|       | Obese | Male   | 33.69±0.95 <sup>a***</sup> | 30.14±0.59 <sup>a,b</sup>  | 27.29±1.07 <sup>b</sup>  | 27.67±0.40 <sup>b*</sup> |
|       |       | Female | 29.70±1.41 <sup>a</sup>    | 30.10±2.59 <sup>a</sup>    | 22.88±0.73 <sup>a</sup>  | 25.38±2.38 <sup>a</sup>  |

Values are presented as mean ± SE. Row means without a common superscript letter (a, b, and c) differ significantly,  $P < 0.05$ .

\*\*\*\* $P < 0.0001$  \*\*\* $P < 0.001$  \*\* $P < 0.01$  \* $P < 0.05$  versus respective lean JCR rats on the same diet, 2-way ANOVA.

‡ $P < 0.05$  versus respective male JCR rats on the same diet, 2-way ANOVA.

N=8. Con, control diet; CFlax, 10% ground flaxseed supplemented control diet; HFHS, high-fat high sucrose diet; HFlax, 10% ground flaxseed supplemented high-fat high sucrose diet.

## Figure Legends

**Figure S1.** Composition of liver saturated fatty acids in lean and obese male and female JCR:LA rats as a function of diet. Abbreviations: CTR: control diet; FX: flaxseed supplemented diet; HFHS: high fat and high sucrose supplemented diet; HFX: high fat, high sucrose and flaxseed supplemented diet; \* $P < 0.05$  versus respective control group; \*\* $P < 0.05$  versus respective HFHS group; \*\*\* $P < 0.05$  obese vs lean within same respective dietary group; (n=7 or 8).

**Figure S2.** Composition of liver monounsaturated fatty acids in lean and obese male and female JCR:LA rats as a function of diet. Abbreviations: CTR: control diet; FX: flaxseed supplemented diet; HFHS: high fat and high sucrose supplemented diet; HFX: high fat, high sucrose and flaxseed supplemented diet; \* $P < 0.05$  versus respective control group; \*\* $P < 0.05$  versus respective HFHS group; \*\*\* $P < 0.05$  obese vs lean within same respective dietary group; (n=7 or 8).

**Figure S3.** Composition of liver polyunsaturated fatty acids in lean and obese male and female JCR:LA rats as a function of diet. Abbreviations: CTR: control diet; FX: flaxseed supplemented diet; HFHS: high fat and high sucrose supplemented diet; HFX: high fat, high sucrose and flaxseed supplemented diet; \* $P < 0.05$  versus respective control group; \*\* $P < 0.05$  versus respective HFHS group; \*\*\* $P < 0.05$  obese vs lean within same respective dietary group; (n=7 or 8).

**Figure S4.** Composition of liver n-3 polyunsaturated fatty acids in lean and obese male and female JCR:LA rats as a function of diet. Abbreviations: CTR: control diet; FX: flaxseed supplemented diet; HFHS: high fat and high sucrose supplemented diet; HFX: high fat, high sucrose and flaxseed supplemented diet; \* $P < 0.05$  versus respective control group; \*\* $P < 0.05$  versus respective HFHS group; \*\*\* $P < 0.05$  obese vs lean within same respective dietary group; (n=7 or 8).

**Figure S5.** Logarithmic correlation between polyunsaturated fatty acids and ALT and AST release into the plasma. C18:3n3 (A); C22:6n3 (B); C22:5n3 (C).

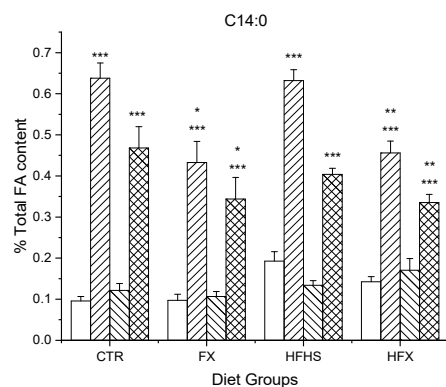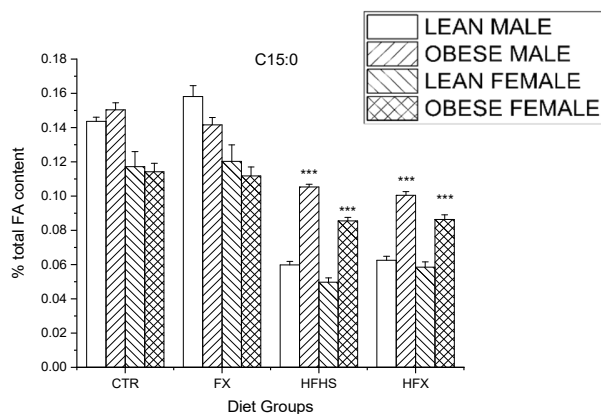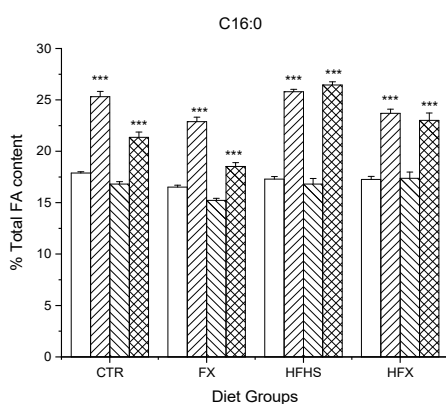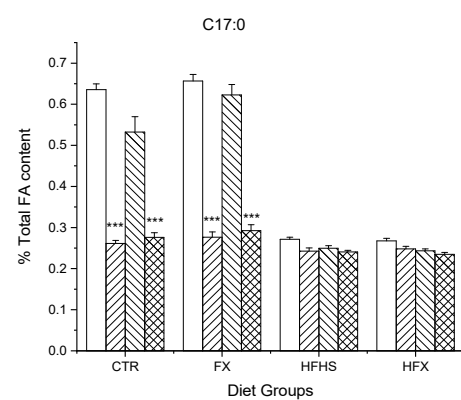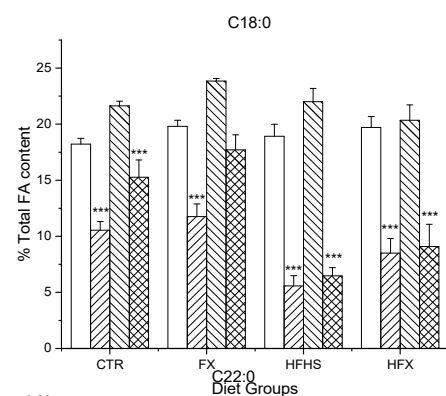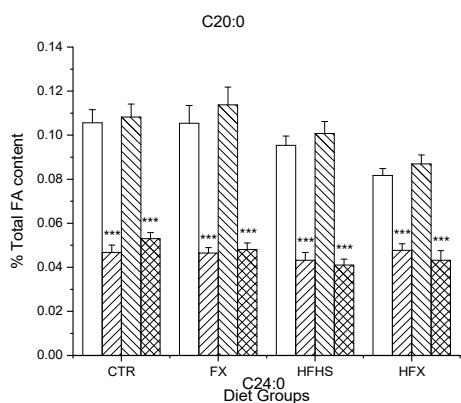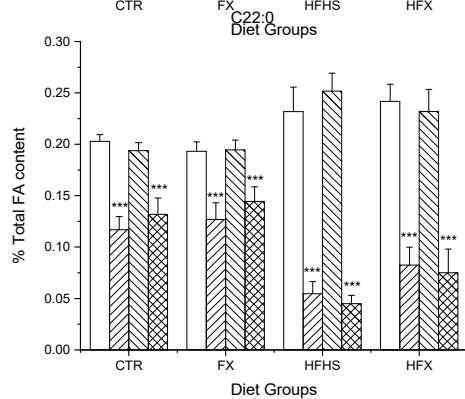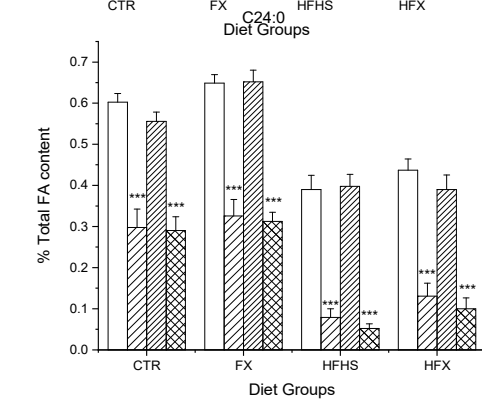

**Figure S1.** Composition of liver saturated fatty acids in lean and obese male and female JCR:LA rats as a function of diet. Abbreviations: CTR: control diet; FX: flaxseed supplemented diet; HFHS: high fat and high sucrose supplemented diet; HFX: high fat, high sucrose and flaxseed supplemented diet; \* $P < 0.05$  versus respective control group; \*\* $P < 0.05$  versus respective HFHS group; \*\*\* $P < 0.05$  obese vs lean within same respective dietary group; (n=7 or 8).

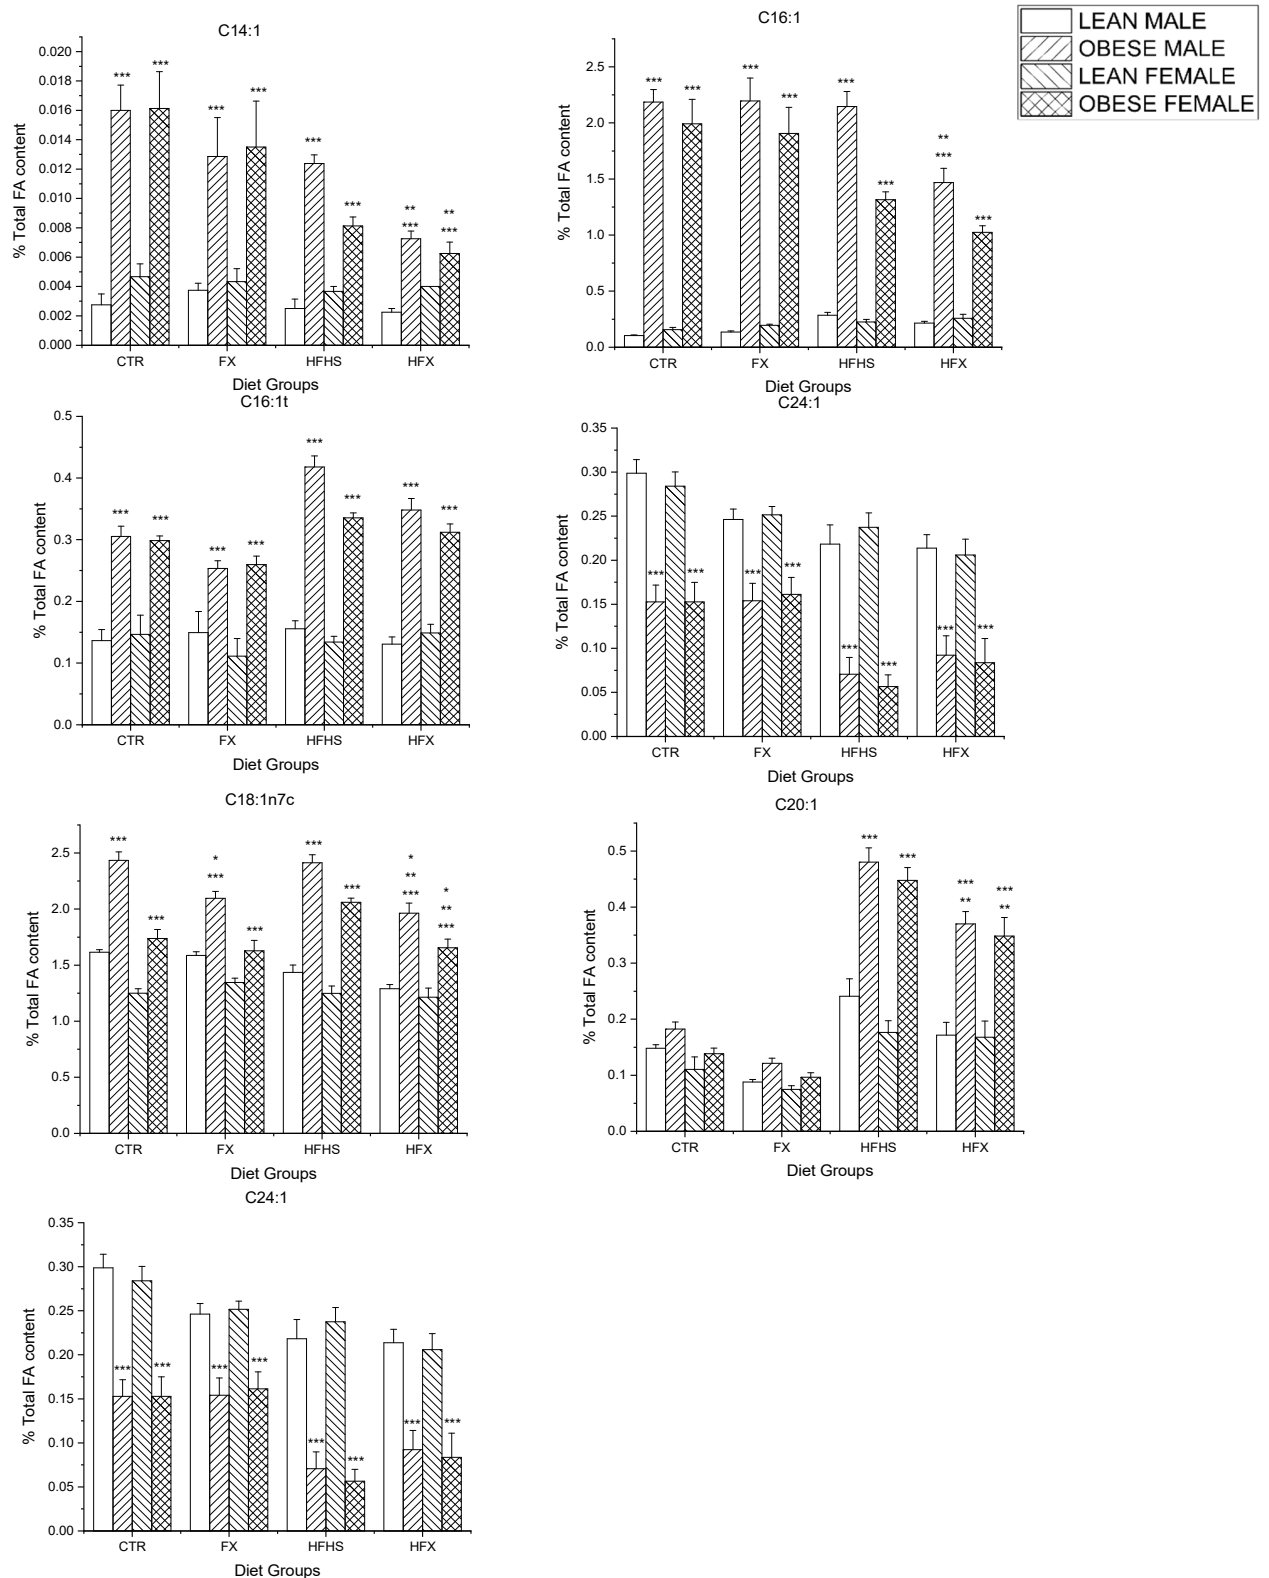

**Figure S2.** Composition of liver monounsaturated fatty acids in lean and obese male and female JCR:LA rats as a function of diet. Abbreviations: CTR: control diet; FX: flaxseed supplemented diet; HFHS: high fat and high sucrose supplemented diet; HFX: high fat, high sucrose and flaxseed supplemented diet; \*P < 0.05 versus respective control group; \*\*P < 0.05 versus respective HFHS group; \*\*\*P < 0.05 obese vs lean within same respective dietary group; (n=7 or 8).

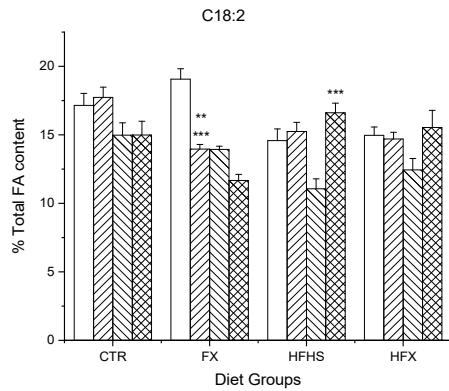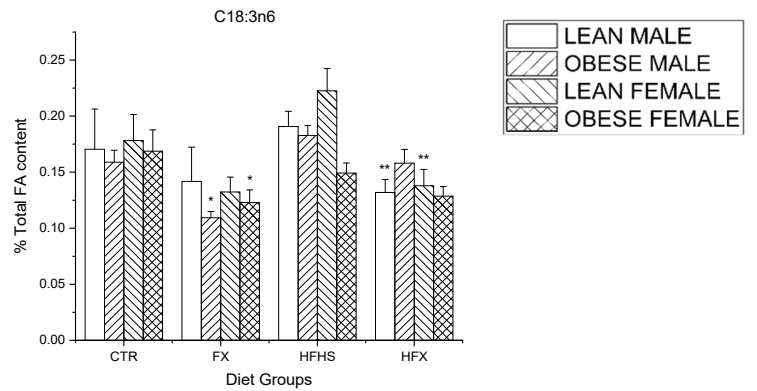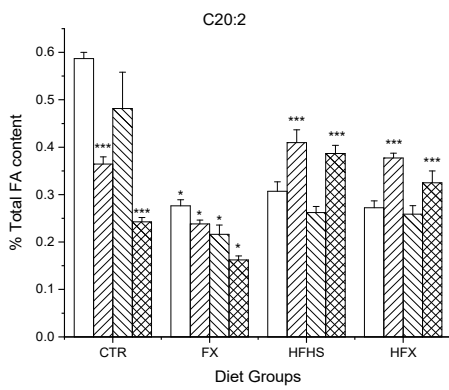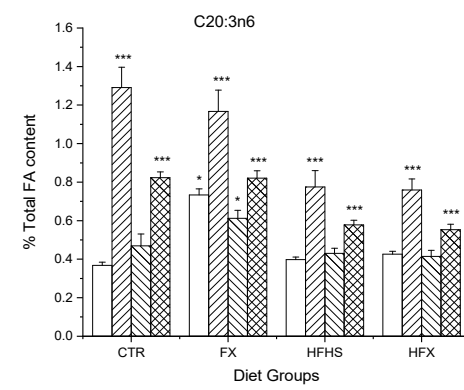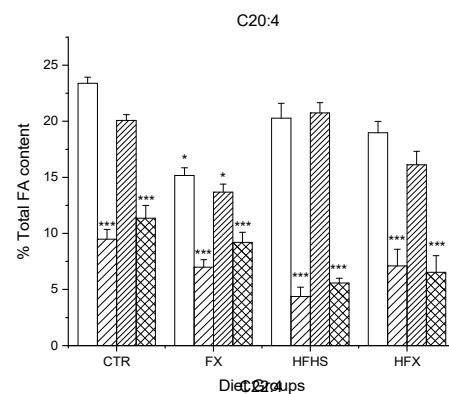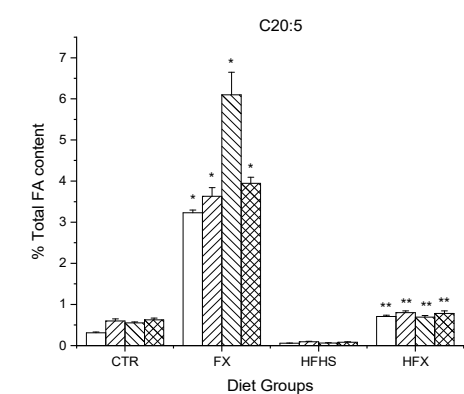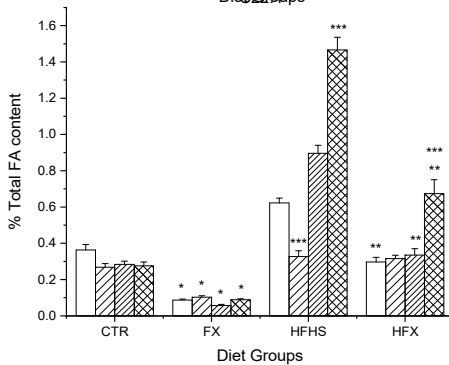



**Figure S3.** Composition of liver polyunsaturated fatty acids in lean and obese male and female JCR:LA rats as a function of diet. Abbreviations: CTR: control diet; FX: flaxseed supplemented diet; HFHS: high fat and high sucrose supplemented diet; HFX: high fat, high sucrose and flaxseed supplemented diet; \* $P < 0.05$  versus respective control group; \*\* $P < 0.05$  versus respective HFHS group; \*\*\* $P < 0.05$  obese vs lean within same respective dietary group; (n=7 or 8).

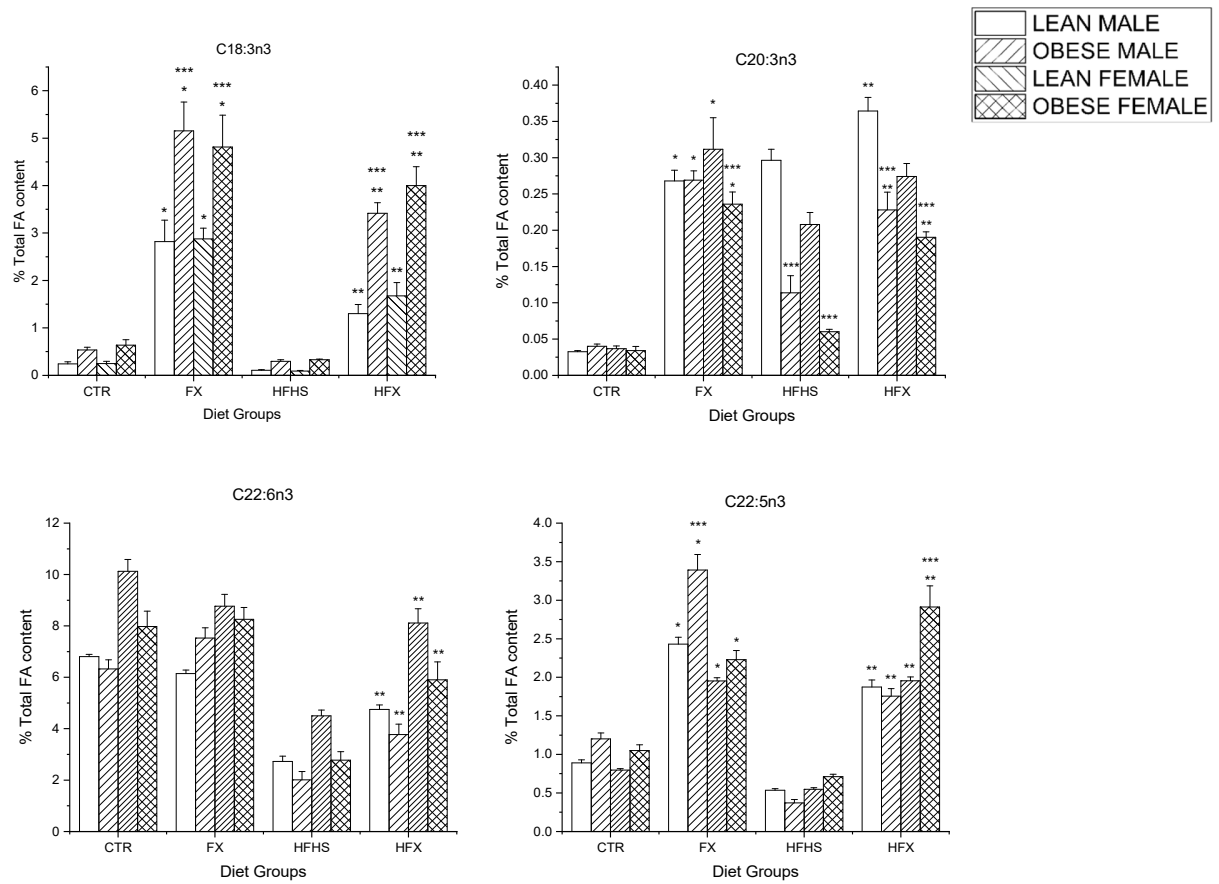

**Figure S4.** Composition of liver n-3 polyunsaturated fatty acids in lean and obese male and female JCR:LA rats as a function of diet. Abbreviations: CTR: control diet; FX: flaxseed supplemented diet; HFHS: high fat and high sucrose supplemented diet; HFX: high fat, high sucrose and flaxseed supplemented diet; \* $P < 0.05$  versus respective control group; \*\* $P < 0.05$  versus respective HFHS group; \*\*\* $P < 0.05$  obese vs lean within same respective dietary group; (n=7 or 8).

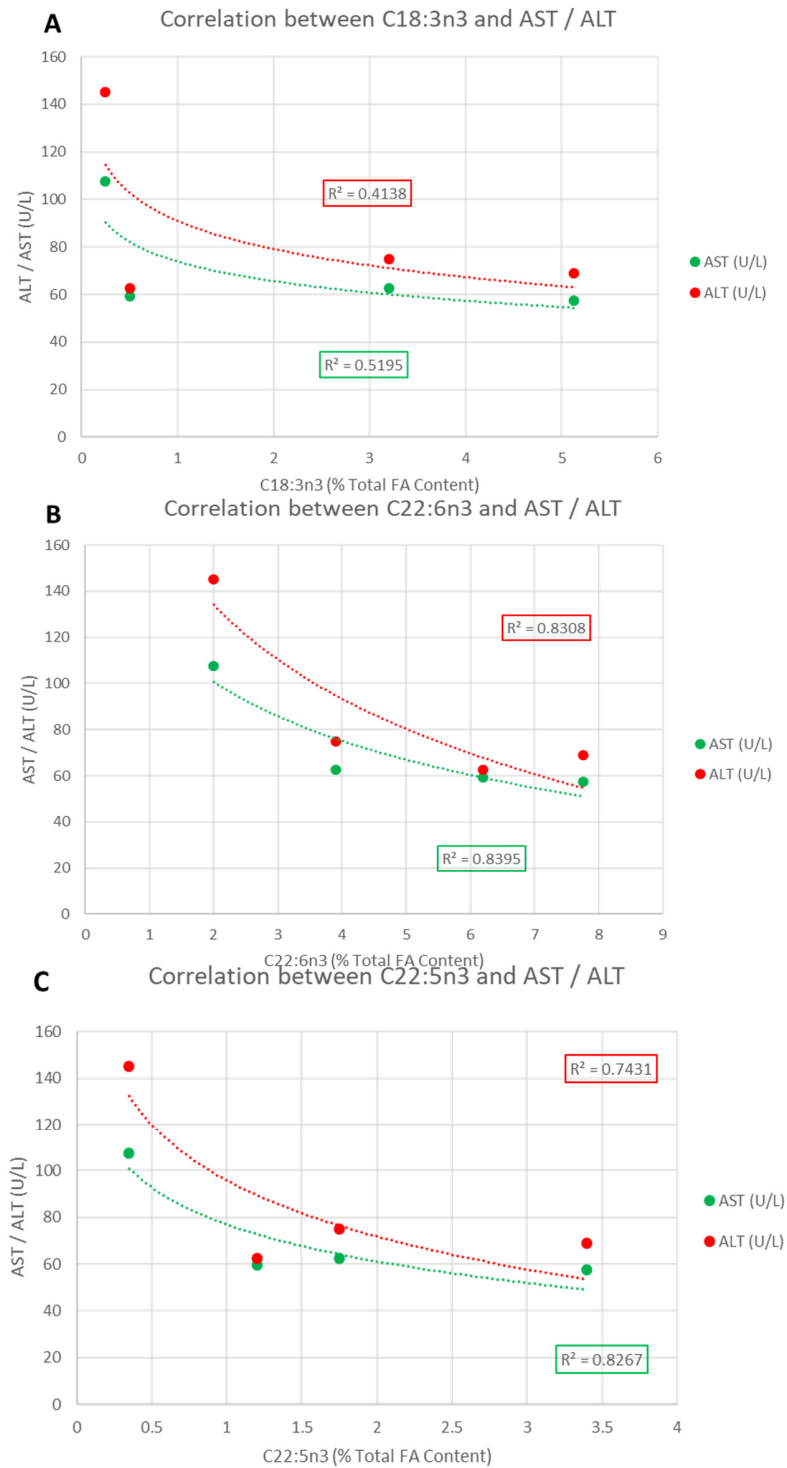

**Figure S5.** Logarithmic correlation between polyunsaturated fatty acids and ALT and AST release into the plasma. C18:3n3 (A); C22:6n3 (B); C22:5n3 (C).
